# Supplementary material
Source: publisher figshare collection journal article supplement (https://karger.figshare.com/ndownloader/files/18017222)
Supplement: Supplementary file 1 [file 18017222]

**SUPPLEMENTAL MATERIAL**

Infarct Patterns in Patients with Atherosclerotic Vertebrobasilar Disease in Relation to Hemodynamics

**VERiTAS study group**

Clinical Coordinating Center

University of Illinois at Chicago

PI: Sepideh Amin-Hanjani, MD

Project Manager: Linda Rose-Finnell, MPA CCRA

Data Management Center

Center for Stroke Research, University of Illinois at Chicago

Director: DeJuran Richardson, PhD, Dilip Pandey. MD PhD

Biostatisticians: Xinjian Du, MD MPH, Hui Xie, PhD

Database Administrator: Xinjian Du, MD MPH

Participating sites (in descending order of number of enrollees)

**University of Illinois at Chicago**

Site PI: Sepideh Amin-Hanjani, MD

Project Manager: Linda Rose- Finnell, MPA CCRA

Site MR Team: Keith Thulborn, MD, PhD, Michael P. Flannery, Hagai Ganin

Study Physician(s): Sean Ruland, DO, Rebecca Grysiewicz, DO, Aslam Khaja, MD, Laura Pedelty, MD, Fernando Testai, MD, Archie Ong, MD, Noam Epstein, MD, Hurmina Muqtadar, MD

Coordinator(s): Karriem Watson, MD, Nada Mlinarevich, RN, Maureen Hillmann, RN

**Columbia University, New York:**

Site PI: Mitchell S.V. Elkind, MD

Site MR Team: Joy Hirsch, PhD, Stephen Dashnaw

Study Physician(s): Philip M. Meyers, MD, Josh Z. Willey, MD

Coordinator(s): Edwina McNeill-Simaan, BS, Veronica Perez, MA, Alberto Canaan, MD, Wayna Paulino-Hernandez, MD

**Washington** **University, St. Louis:**

Site PI: Gregory J. Zipfel, MD

Site MR Team: Katie Vo, MD, Glenn Foster

Study Physicians: Andria Ford, MD, Abdullah Nassief, MD

Coordinator(s): Abbie Bradley, RN, BSN, MSW, Jannie Serna-Northway, RN, BSN, Kristi Kraus, RN, Lina Shiwani, BS, Nancy Hantler, BS, CCRC

**University of California, Los Angeles:**

Site PI: David S. Liebeskind, MD

Site MR Team: Jeffrey Alger, PhD, Sergio Godinez

Study Physician(s): Jeffrey L. Saver, MD, Latisha Ali, MD, Doojin Kim, MD, Matthew Tenser, MD, Michael Froehler, MD, Radoslav Raychev, MD, Sarah Song, MD, Bruce Ovbiagele, MD, Hermelinda Abcede, MD, Peter Adamczyk, MD, Neal Rao, MD, Anil Yallapragada, MD, Royya Modir, MD, Jason Hinman, MD, Aaron Tansy, MD, Mateo Calderon-Arnulphi, MD, Sunil Sheth, MD, Alireza Noorian, MD, Kwan Ng, MD, Conrad Liang, MD

Coordinator: Jignesh Gadhia, BS, Hannah Smith, BS, Gilda Avila, BS, Johanna Avelar, BA

**University of Toronto -Toronto Western Hospital, Toronto**

Site PI: Frank L. Silver, MD

Site MR Team: David Mikulis, MD, Jorn Fierstra, Eugen Hlasny

Study Physician(s): Leanne K. Casaubon, MD, Mervyn Vergouwen, MD, J.C. Martin del Campo, MD, Cheryl S. Jaigobin, MD

Coordinator(s): Cherissa Astorga, RN, Libby Kalman, RN

Satellite Site

**Mercy Hospital and Medical Center, Chicago:**

Site PI: Jeffrey Kramer, MD

Study Physician(s): Susan Vaughan, MD

Coordinator(s): Laura Owens, RN

Committees and Panels

**Operations Committee**

Sepideh Amin-Hanjani, MD, FACS (Chair)

Fady T. Charbel, MD, FACS

Dilip K. Pandey, MD, PhD

DeJuran Richardson, PhD

Keith R.Thulborn, MD, PhD

**Advisory Committee**

Colin P. Derdeyn, MD (Chair)

Louis R. Caplan, MD

Philip B. Gorelick, MD, MPH, FACP

**Adjudication Committee**

Scott E. Kasner, MD (Chair)

Brett Kissela, MD

Tanya N. Turan, MD

**Angiography Committee**

Victor Aletich, MD

**NIH/NINDS Program Officer:** Tom P. Jacobs, MD/ Scott Janis PhD
